# Supplementary material
Source: ML conference proceedings conference paper supplement (https://openaccess.thecvf.com/content/ICCV_2017/html/Goyal_The_Something_Something_ICCV_2017_paper.html)
Supplement: Supplementary file 1 [file Goyal_The_Something_Something_ICCV_2017_supplemental.pdf]

## 1. Dataset

### 1.1. 10-selected classes

The mapping used for generating the classes used in the 10-class experiments is shown in Table 3. The 10 classes were defined by first selecting 41 classes by hand (based on class-definitions and on visual inspection of the videos) and subsequently remapping these into 10 groups.

| Class names                           | Index |
|---------------------------------------|-------|
| Dropping [something]                  | 0     |
| Holding [something]                   | 1     |
| Moving [something] from left to right | 2     |
| Moving [something] from right to left | 3     |
| Picking [something] up                | 4     |
| Poking [something]                    | 5     |
| Pouring [something]                   | 6     |
| Putting [something]                   | 7     |
| Showing [something] (almost no hand): | 8     |
| Tearing [something]                   | 9     |

Table 1: Subset of 10 selected classes used in some of the experiments.

Some example predictions from the 10-classes model are shown in the Figure 1

### 1.2. 40-selected classes

We took the above 10 selected classes and select 30 additional common classes to form this subset of data. The list of classes used is shown in the Table 2.

The confusion matrix for predictions on 40 selected classes using the best performing model is shown in Figure 2 and the corresponding dictionary to read classes off from the matrix is shown in the Table 2.

### 1.3. All data - 174 classes

The complete list of 174 classes and their corresponding action-groups is shown in Table 4.

| Class names                                            | Index |
|--------------------------------------------------------|-------|
| Approaching [something] with your camera               | 0     |
| Closing [something]                                    | 1     |
| Dropping [something]                                   | 2     |
| Folding [something]                                    | 3     |
| Holding [something]                                    | 4     |
| Holding [something] next to [something]                | 5     |
| Moving [something] away from [something]               | 6     |
| Moving [something] away from the camera                | 7     |
| Moving [something] closer to [something]               | 8     |
| Moving [something] down                                | 9     |
| Moving [something] from left to right                  | 10    |
| Moving [something] from right to left                  | 11    |
| Moving [something] towards the camera                  | 12    |
| Moving away from [something] with your camera          | 13    |
| Opening [something]                                    | 14    |
| Picking [something] up                                 | 15    |
| Plugging [something] into [something]                  | 16    |
| Poking [something]                                     | 17    |
| Pouring [something]                                    | 18    |
| Pretending to pick [something] up                      | 19    |
| Pretending to put [something] next to [something]      | 20    |
| Pretending to put [something] on a surface             | 21    |
| Pretending to take [something] from [somewhere]        | 22    |
| Pushing [something] so that it slightly moves          | 23    |
| Pushing [something] with [something]                   | 24    |
| Putting [something]                                    | 25    |
| Putting [something] into [something]                   | 26    |
| Showing [something] (almost no hand)                   | 27    |
| Showing a photo of [something] to the camera           | 28    |
| Showing that [something] is empty                      | 29    |
| Stacking [number of] [something]                       | 30    |
| Tearing [something]                                    | 31    |
| Throwing [something] against [something]               | 32    |
| Turning [something] upside down                        | 33    |
| Turning the camera downwards while filming [something] | 34    |
| Turning the camera left while filming [something]      | 35    |
| Turning the camera right while filming [something]     | 36    |
| Turning the camera upwards while filming [something]   | 37    |
| Uncovering [something]                                 | 38    |
| Unfolding [something]                                  | 39    |

Table 2: Subset of 40 selected classes used in some of the experiments.

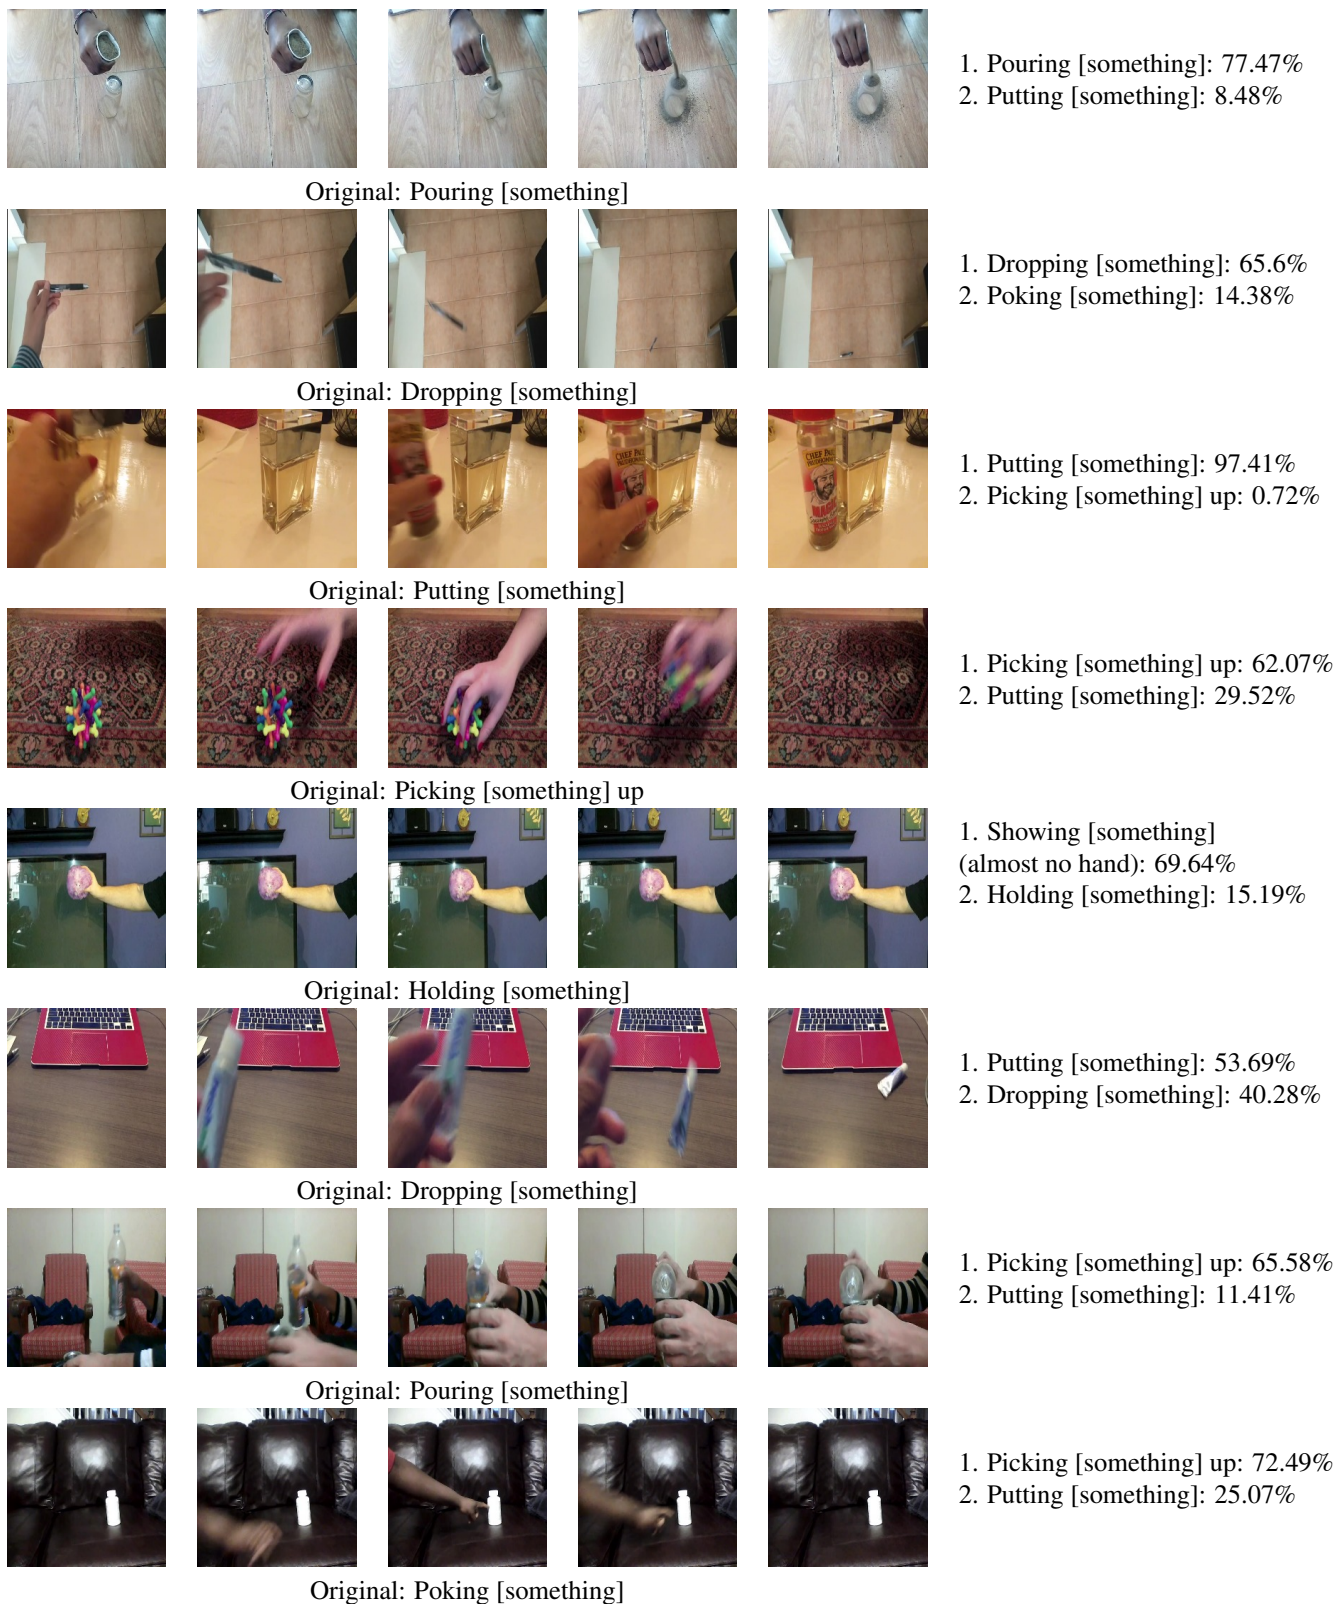

Figure 1: Some example predictions from the best performing baseline model on 10 selected classes experiment

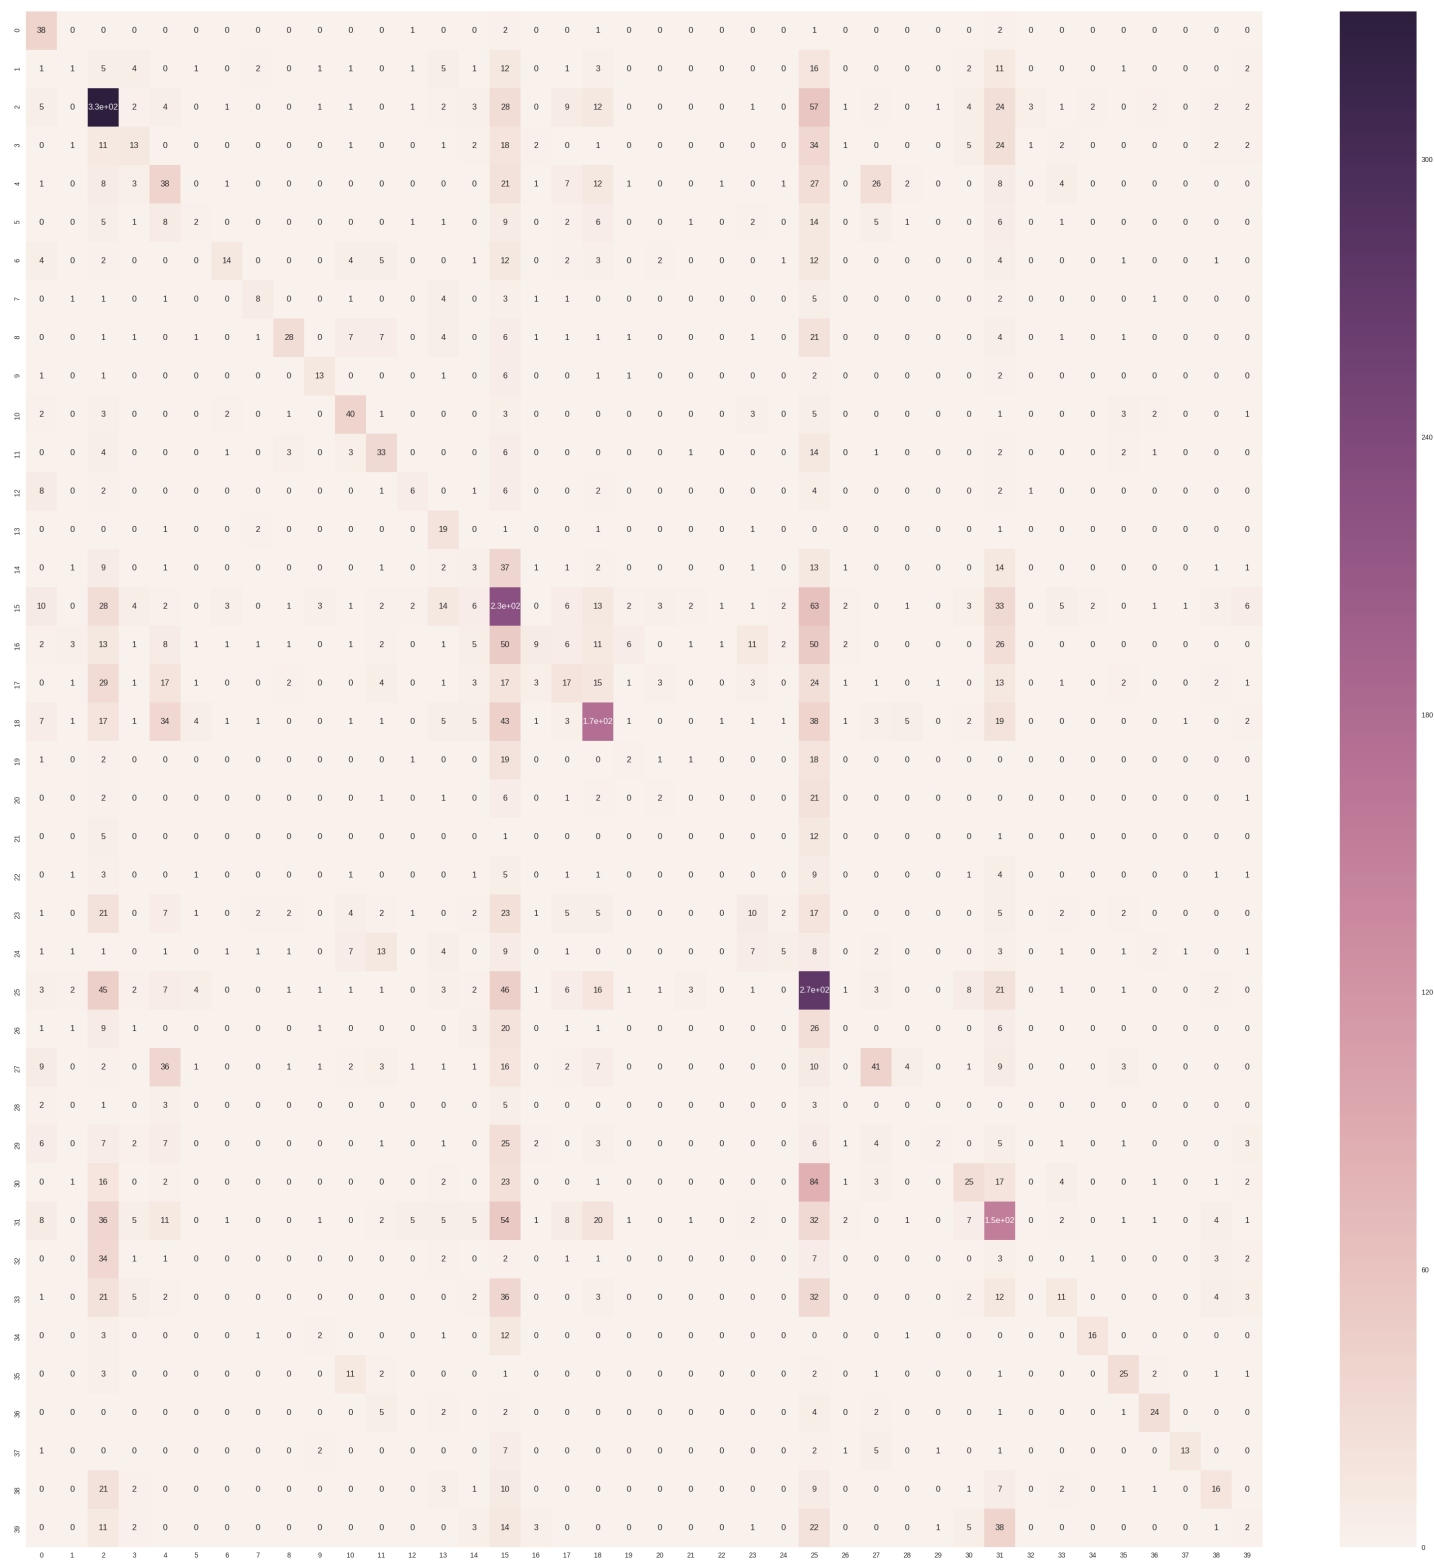

Figure 2: Confusion matrix for the best model trained on the 40 selected classes. Corresponding class-names are listed in Table 2.

Table 3: Mapping used for 10 selected classes

| Actual class                                                                                                                                                                                                                                                                                                                                                                                                                                                                                                            | Mapped class                          |
|-------------------------------------------------------------------------------------------------------------------------------------------------------------------------------------------------------------------------------------------------------------------------------------------------------------------------------------------------------------------------------------------------------------------------------------------------------------------------------------------------------------------------|---------------------------------------|
| [Something] falling like a rock<br>[Something] falling like a feather or paper<br>Throwing [something]<br>Throwing [something] onto a surface<br>Throwing [something] in the air and letting it fall                                                                                                                                                                                                                                                                                                                    | Dropping [something]                  |
| Pushing [something] from right to left<br>Pulling [something] from right to left                                                                                                                                                                                                                                                                                                                                                                                                                                        | Moving [something] from right to left |
| Pulling [something] from left to right<br>Pushing [something] from left to right                                                                                                                                                                                                                                                                                                                                                                                                                                        | Moving [something] from left to right |
| Picking [something] up<br>Lifting [something] up completely without letting it drop down<br>Moving [something] up<br>Lifting [something] with [something] on it<br>Taking [something] from [somewhere]<br>Taking [one of many similar things on the table]<br>Taking [something] out of [something]                                                                                                                                                                                                                     | Picking [something] up                |
| Putting [something] next to [something]<br>Putting [something] onto [something]<br>Putting [something] on a surface<br>Putting [something] similar to other things that are already on the table<br>Putting [something] behind [something]<br>Putting [something], [something] and [something] on the table<br>Putting [something] and [something] on the table<br>Putting [something] on a flat surface without letting it roll<br>Putting [something] that can't roll onto a slanted surface, so it stays where it is | Putting [something]                   |
| Poking [something] so that it falls over<br>Poking [something] so lightly that it doesn't or almost doesn't move<br>Poking a stack of [something] so the stack collapses<br>Poking a stack of [something] without the stack collapsing                                                                                                                                                                                                                                                                                  | Poking [something]                    |
| Tearing [something] into two pieces<br>Tearing [something] just a little bit                                                                                                                                                                                                                                                                                                                                                                                                                                            | Tearing [something]                   |
| Pouring [something] into [something]<br>Pouring [something] onto [something]<br>Pouring [something] out of [something]<br>Pouring [something] into [something] until it overflows<br>Trying to pour [something] into [something], but missing so it spills next to it                                                                                                                                                                                                                                                   | Pouring [something]                   |
| Holding [something]<br>Holding [something] in front of [something]                                                                                                                                                                                                                                                                                                                                                                                                                                                      | Holding [something]                   |
| Showing [something] on top of [something]<br>Showing [something] behind [something]<br>Showing [something] next to [something]                                                                                                                                                                                                                                                                                                                                                                                          | Showing [something] (almost no hand)  |

Table 4: Class labels and their corresponding action-groups for all 174 classes

| Class Labels                                                                                                                                                                                                                                                                                                                                                                                               | Action Groups                                      |
|------------------------------------------------------------------------------------------------------------------------------------------------------------------------------------------------------------------------------------------------------------------------------------------------------------------------------------------------------------------------------------------------------------|----------------------------------------------------|
| Trying but failing to attach [something] to [something] because it doesn't stick<br>Attaching [something] to [something]                                                                                                                                                                                                                                                                                   | Attaching/Trying to attach                         |
| Bending [something] until it breaks<br>Trying to bend [something unbendable] so nothing happens<br>Bending [something] so that it deforms                                                                                                                                                                                                                                                                  | Bending something                                  |
| Digging [something] out of [something]<br>Burying [something] in [something]                                                                                                                                                                                                                                                                                                                               | Burying or digging something                       |
| Moving away from [something] with your camera<br>Turning the camera right while filming [something]<br>Approaching [something] with your camera<br>Turning the camera left while filming [something]<br>Turning the camera upwards while filming [something]<br>Moving [something] away from the camera<br>Moving [something] towards the camera<br>Turning the camera downwards while filming [something] | Camera motions                                     |
| [Something] colliding with [something] and both are being deflected<br>[Something] being deflected from [something]<br>[Something] colliding with [something] and both come to a halt                                                                                                                                                                                                                      | Collisions of objects                              |
| Uncovering [something]<br>Covering [something] with [something]                                                                                                                                                                                                                                                                                                                                            | Covering                                           |
| Putting [something similar to other things that are already on the table]<br>Taking [one of many similar things on the table]                                                                                                                                                                                                                                                                              | Crowd of things                                    |
| Dropping [something] into [something]<br>Dropping [something] onto [something]<br>Dropping [something] next to [something]<br>Dropping [something] in front of [something]<br>Dropping [something] behind [something]                                                                                                                                                                                      | Dropping something                                 |
| Showing [something] next to [something]<br>Showing [something] on top of [something]<br>Showing [something] behind [something]                                                                                                                                                                                                                                                                             | Filming objects, without any actions               |
| Folding [something]<br>Unfolding [something]                                                                                                                                                                                                                                                                                                                                                               | Folding something                                  |
| Hitting [something] with [something]                                                                                                                                                                                                                                                                                                                                                                       | Hitting something with something                   |
| Holding [something] in front of [something]<br>Holding [something] behind [something]<br>Holding [something] next to [something]<br>Holding [something]<br>Holding [something] over [something]                                                                                                                                                                                                            | Holding something                                  |
| Lifting up one end of [something], then letting it drop down<br>Lifting up one end of [something] without letting it drop down<br>Lifting [something] up completely, then letting it drop down<br>Lifting [something] up completely without letting it drop down                                                                                                                                           | Lifting and (not) dropping something               |
| Tilting [something] with [something] on it until it falls off<br>Lifting [something] with [something] on it<br>Tilting [something] with [something] on it slightly so it doesn't fall down                                                                                                                                                                                                                 | Lifting/Tilting objects with other objects on them |
| Moving [something] up<br>Moving [something] down                                                                                                                                                                                                                                                                                                                                                           | Moving something                                   |

|                                                                                                                                                                                                                                                                                                                                                                                                                                                 |                                           |
|-------------------------------------------------------------------------------------------------------------------------------------------------------------------------------------------------------------------------------------------------------------------------------------------------------------------------------------------------------------------------------------------------------------------------------------------------|-------------------------------------------|
| Moving [something] and [something] away from each other<br>Moving [something] and [something] closer to each other<br>Moving [something] closer to [something]<br>Moving [something] away from [something]                                                                                                                                                                                                                                      | Moving two objects relative to each other |
| Moving [part] of [something]<br>Touching (without moving) [part] of [something]                                                                                                                                                                                                                                                                                                                                                                 | Moving/Touching a part of something       |
| Opening [something]<br>Pretending to close [something] without actually closing it<br>Pretending to open [something] without actually opening it<br>Closing [something]                                                                                                                                                                                                                                                                         | Opening or closing something              |
| Picking [something] up<br>Pretending to pick [something] up                                                                                                                                                                                                                                                                                                                                                                                     | Picking something up                      |
| Piling [something] up                                                                                                                                                                                                                                                                                                                                                                                                                           | Piles of stuff                            |
| Plugging [something] into [something] but pulling it right out as you remove your hand<br>Plugging [something] into [something]                                                                                                                                                                                                                                                                                                                 | Plugging something into something         |
| Poking [something] so it slightly moves<br>Poking [something] so lightly that it doesn't or almost doesn't move<br>Poking a stack of [something] without the stack collapsing<br>Poking a hole into [something soft]<br>Pretending to poke [something]<br>Poking [something] so that it falls over<br>Poking a stack of [something] so the stack collapses<br>Poking a hole into [some substance]<br>Poking [something] so that it spins around | Poking something                          |
| Trying to pour [something] into [something], but missing so it spills next to it<br>Pretending to pour [something] out of [something], but [something] is empty<br>Pouring [something] out of [something]<br>Pouring [something] onto [something]<br>Pouring [something] into [something]<br>Pouring [something] into [something] until it overflows                                                                                            | Pouring something                         |
| Pulling [something] from behind of [something]<br>Pulling [something] from right to left<br>Pulling [something] out of [something]<br>Pulling [something] onto [something]<br>Pulling [something] from left to right                                                                                                                                                                                                                            | Pulling something                         |
| Pulling two ends of [something] but nothing happens<br>Pulling two ends of [something] so that it separates into two pieces<br>Pulling two ends of [something] so that it gets stretched                                                                                                                                                                                                                                                        | Pulling two ends of something             |
| Pushing [something] onto [something]<br>Pushing [something] from right to left<br>Pushing [something] with [something]<br>Pushing [something] so that it falls off the table<br>Pushing [something] so that it almost falls off the table but doesn't<br>Pushing [something] off of [something]<br>Pushing [something] so that it slightly moves<br>Pushing [something] from left to right                                                      | Pushing something                         |
| Pretending to put [something] on a surface<br>Putting [something] on a surface                                                                                                                                                                                                                                                                                                                                                                  | Putting something somewhere               |
| Laying [something] on the table on its side, not upright<br>Putting [something that cannot actually stand upright] upright on the table, so it falls on its side<br>Putting [something] upright on the table                                                                                                                                                                                                                                    | Putting something upright/on its side     |

|                                                                                                                                                                                                                                                                                                                                                                                                                                                                                                                                                                                                                                                                                                                                                                                                                                                                                                                                                                                                                                                                           |                                                          |
|---------------------------------------------------------------------------------------------------------------------------------------------------------------------------------------------------------------------------------------------------------------------------------------------------------------------------------------------------------------------------------------------------------------------------------------------------------------------------------------------------------------------------------------------------------------------------------------------------------------------------------------------------------------------------------------------------------------------------------------------------------------------------------------------------------------------------------------------------------------------------------------------------------------------------------------------------------------------------------------------------------------------------------------------------------------------------|----------------------------------------------------------|
| Putting [something] underneath [something]<br>Putting [something] onto [something else that cannot support it] so it falls down<br>Failing to put [something] into [something] because [something] does not fit<br>Putting [something], [something] and [something] on the table<br>Pretending to put [something] behind [something]<br>Putting [something] in front of [something]<br>Taking [something] out of [something]<br>Pretending to put [something] onto [something]<br>Putting [something] and [something] on the table<br>Pretending to take [something] out of [something]<br>Putting [something] onto [something]<br>Pretending to put [something] into [something]<br>Pretending to put [something] underneath [something]<br>Putting [something] next to [something]<br>Putting [something] behind [something]<br>Putting [something] on the edge of [something] so it is not supported and falls down<br>Removing [something], revealing [something] behind<br>Pretending to put [something] next to [something]<br>Putting [something] into [something] | Putting/Taking objects into/out of/next to/other objects |
| Letting [something] roll along a flat surface<br>Rolling [something] on a flat surface<br>Putting [something] that can't roll onto a slanted surface, so it slides down<br>Lifting a surface with [something] on it until it starts sliding down<br>Letting [something] roll down a slanted surface<br>Lifting a surface with [something] on it but not enough for it to slide down<br>Letting [something] roll up a slanted surface, so it rolls back down<br>Putting [something] onto a slanted surface but it doesn't glide down<br>Putting [something] that can't roll onto a slanted surface, so it stays where it is<br>Putting [something] on a flat surface without letting it roll                                                                                                                                                                                                                                                                                                                                                                               | Rolling and sliding something                            |
| Pretending to scoop [something] up with [something]<br>Scooping [something] up with [something]                                                                                                                                                                                                                                                                                                                                                                                                                                                                                                                                                                                                                                                                                                                                                                                                                                                                                                                                                                           | Scooping something up                                    |
| Showing [something] to the camera<br>Showing a photo of [something] to the camera                                                                                                                                                                                                                                                                                                                                                                                                                                                                                                                                                                                                                                                                                                                                                                                                                                                                                                                                                                                         | Showing objects and photos of objects                    |
| Showing that [something] is empty<br>Showing that [something] is inside [something]                                                                                                                                                                                                                                                                                                                                                                                                                                                                                                                                                                                                                                                                                                                                                                                                                                                                                                                                                                                       | Showing that something is full/empty                     |
| Moving [something] across a surface without it falling down<br>Moving [something] across a surface until it falls down                                                                                                                                                                                                                                                                                                                                                                                                                                                                                                                                                                                                                                                                                                                                                                                                                                                                                                                                                    | Something (not) falling over an edge                     |
| [Something] falling like a feather or paper<br>[Something] falling like a rock                                                                                                                                                                                                                                                                                                                                                                                                                                                                                                                                                                                                                                                                                                                                                                                                                                                                                                                                                                                            | Something falling                                        |
| Moving [something] and [something] so they collide with each other<br>Moving [something] and [something] so they pass each other                                                                                                                                                                                                                                                                                                                                                                                                                                                                                                                                                                                                                                                                                                                                                                                                                                                                                                                                          | Something passing/hitting another thing                  |
| Spilling [something] next to [something]<br>Spilling [something] onto [something]<br>Spilling [something] behind [something]                                                                                                                                                                                                                                                                                                                                                                                                                                                                                                                                                                                                                                                                                                                                                                                                                                                                                                                                              | Spilling something                                       |
| Spinning [something] so it continues spinning<br>Spinning [something] that quickly stops spinning<br>Pushing [something] so it spins                                                                                                                                                                                                                                                                                                                                                                                                                                                                                                                                                                                                                                                                                                                                                                                                                                                                                                                                      | Spinning something                                       |
| Spreading [something] onto [something]<br>Pretending to spread 'air' onto [something]                                                                                                                                                                                                                                                                                                                                                                                                                                                                                                                                                                                                                                                                                                                                                                                                                                                                                                                                                                                     | Spreading something onto something                       |
| Pretending to sprinkle 'air' onto [something]<br>Sprinkling [something] onto [something]                                                                                                                                                                                                                                                                                                                                                                                                                                                                                                                                                                                                                                                                                                                                                                                                                                                                                                                                                                                  | Sprinkling something onto something                      |
| Squeezing [something]<br>Pretending to squeeze [something]                                                                                                                                                                                                                                                                                                                                                                                                                                                                                                                                                                                                                                                                                                                                                                                                                                                                                                                                                                                                                | Squeezing something                                      |

|                                                                                                                                                                                                                                                      |                                   |
|------------------------------------------------------------------------------------------------------------------------------------------------------------------------------------------------------------------------------------------------------|-----------------------------------|
| Stacking [number of] [something]<br>Putting [number of] [something] onto [something]                                                                                                                                                                 | Stacking or placing N things      |
| Stuffing [something] into [something]                                                                                                                                                                                                                | Stuffing/Taking out               |
| Taking [something] from [somewhere]<br>Pretending to take [something] from [somewhere]                                                                                                                                                               | Taking something                  |
| Tearing [something] just a little bit<br>Pretending to be tearing [something that is not tearable]<br>Tearing [something] into two pieces                                                                                                            | Tearing something                 |
| Throwing [something] against [something]<br>Throwing [something]<br>Throwing [something] in the air and catching it<br>Pretending to throw [something]<br>Throwing [something] in the air and letting it fall<br>Throwing [something] onto a surface | Throwing something                |
| Tipping [something] with [something in it] over, so [something in it] falls out<br>Tipping [something] over                                                                                                                                          | Tipping something over            |
| Pretending to turn [something] upside down<br>Turning [something] upside down                                                                                                                                                                        | Turning something upside down     |
| Twisting (wringing) [something] wet until water comes out<br>Pretending or trying and failing to twist [something]<br>Twisting [something]                                                                                                           | Twisting something                |
| Pretending or failing to wipe [something] off of [something]<br>Wiping [something] off of [something]                                                                                                                                                | Wiping something off of something |

#### 1.4. Data Collection Platform

We show some snapshots of our data collection platform in Figures 3 and 4. They demonstrate the platform used by the crowd-workers to select classes and to upload corresponding videos.



You have selected **5** of **10** descriptions

- ▶ Folding something (2)
- ▶ Stuffing/Taking out (1)
- ▼ Holding something (5)
  - Holding [something]
  - Holding [something] over [something]
  - Holding [something] next to [something]
  - Holding [something] in front of [something]
  - Holding [something] behind [something]
- ▶ Crowd of things (2)
- ▶ Shadows (1)
- ▶ Collisions of objects (3)
- ▼ Tearing something (3)
  - Tearing [something] into two pieces
  - Pretending to be tearing [something that is not tearable]
  - Tearing [something] just a little bit
- ▶ Lifting/Tilting objects with other objects on them (3)
- ▼ Moving two objects relative to each other (4)
  - Moving [something] closer to [something]
  - Moving [something] away from [something]
  - Moving [something] and [something] closer to each other (fix the camera and use both hands to move both objects)
  - Moving [something] and [something] away from each other (fix the camera and use both hands to move both objects)
- ▶ Attaching/Trying to attach (2)
- ▶ Spinning something (3)
- ▶ Something falling (2)
- ▶ Putting/Taking objects into/out of/next to/... other objects (19)
- ▼ Rolling and sliding something (10)
  - Letting [something] roll down a slanted surface
  - Letting [something] roll up a slanted surface, so it rolls back down
  - Letting [something] roll along a flat surface
  - Putting [something] on a flat surface without letting it roll
  - Putting [something] that can't roll onto a slanted surface, so it stays where it is
  - Putting [something] that can't roll onto a slanted surface, so it slides down
  - Lifting a surface with [something] on it until it starts sliding down
  - Lifting a surface with [something] on it but not enough for it to slide down
  - Putting [something] onto a slanted surface but it doesn't glide down
  - Rolling [something] on a flat surface
- ▶ Plugging something into something (2)

You have selected **10** of **10** descriptions

- ▶ Folding something (2)
- ▶ Stuffing/Taking out (1)
- ▶ Holding something (5)
- ▶ Crowd of things (2)
- ▶ Shadows (1)
- ▶ Collisions of objects (3)
- ▶ Tearing something (3)
- ▶ Lifting/Tilting objects with other objects on them (3)
- ▶ Moving two objects relative to each other (4)
- ▶ Attaching/Trying to attach (2)
- ▶ Spinning something (3)
- ▶ Something falling (2)
- ▶ Putting/Taking objects into/out of/next to/... other objects (19)
- ▶ Rolling and sliding something (10)
- ▶ Plugging something into something (2)
- ▶ Twisting something (3)
- ▶ Opening or closing something (4)
- ▶ Pushing something (9)
- ▶ Tipping something over (2)
- ▶ Filming objects, without any actions (3)
- ▶ Spilling something (3)
- ▶ Turning something upside down (2)
- ▶ Putting something somewhere (2)
- ▶ Picking something up (2)
- ▶ Hitting something with something (1)
- ▶ Dropping something (5)
- ▶ Poking something (9)
- ▶ Throwing something (6)
- ▶ Wiping something off of something (2)
- ▶ Camera motions (8)
- ▶ Showing objects and photos of objects (2)
- ▶ Squeezing something (2)
- ▶ Bending something (3)

You have uploaded **10** of **10** videos [Submit Task](#)

### Submit Task

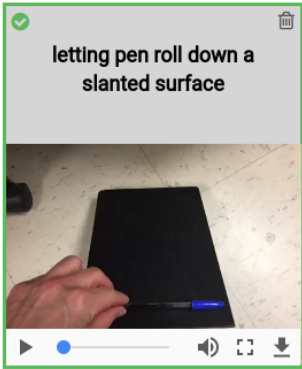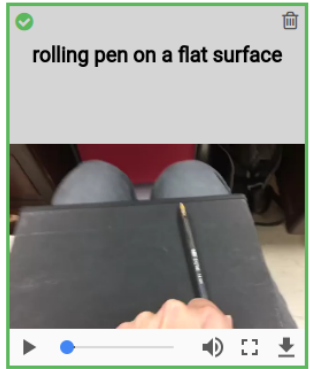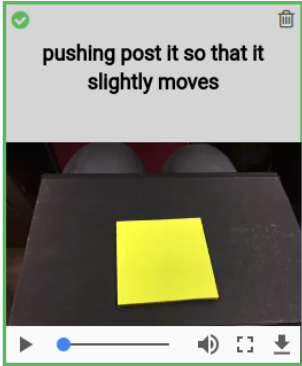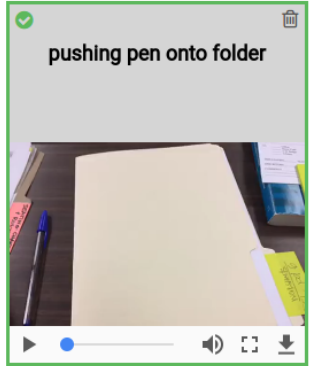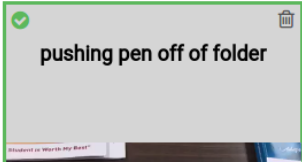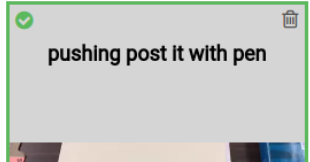

Figure 4: An example of the upload interface after uploading videos and entering input-text.
